# Supplementary material for: easyCLIP analysis of RNA-protein interactions incorporating absolute quantification
Source: PubMed Central journal article supplement (PMC7946914; doi:10.1038/s41467-021-21623-4), 2021-03-10
Supplement: 41467_2021_21623_MOESM11_ESM.pdf [file 41467_2021_21623_MOESM11_ESM.pdf]

**Title: Supplementary Data 1**

**Description:** The full easyCLIP protocol and oligonucleotide sequences.

**Title: Supplementary Data 2**

**Description:** Description of high-throughput sequencing datasets included in this study.

**Title: Supplementary Data 3**

**Description:** Raw counts, counts per million reads, and counts per ten billion proteins for all proteins.

**Title: Supplementary Data 4**

**Description:** P values for all proteins across all RNAs, determined by negative binomial fits to random non-RBPs in all cases.

**Title: Supplementary Data 5**

**Description:** Peak locations for all proteins in all RNAs.

**Title: Supplementary Data 6**

**Description:** Cross-linking molecule number estimates.

**Title: Supplementary Data 7**

**Description:** EdgeR analysis of easyCLIP data for wild-type and mutant forms of recurrently mutated RBPs. P values were calculated with the EdgeR function glmQLFTest.

**Title: Supplementary Data 8**

**Description:** RNA-seq analysis of recurrent missense mutations. Adjusted P values calculated by DESeq2 (see methods).
